# Supplementary material for: The value of blood cytokines and chemokines in assessing COPD
Source: Springer Nature journal article supplement (doi:10.1186/s12931-017-0662-2), 2017-10-24

# Cross Sectional Associations in COPDGene (N = 112) and SPIROMICS (N = 91) Subjects with Bronchitis and Emphysema

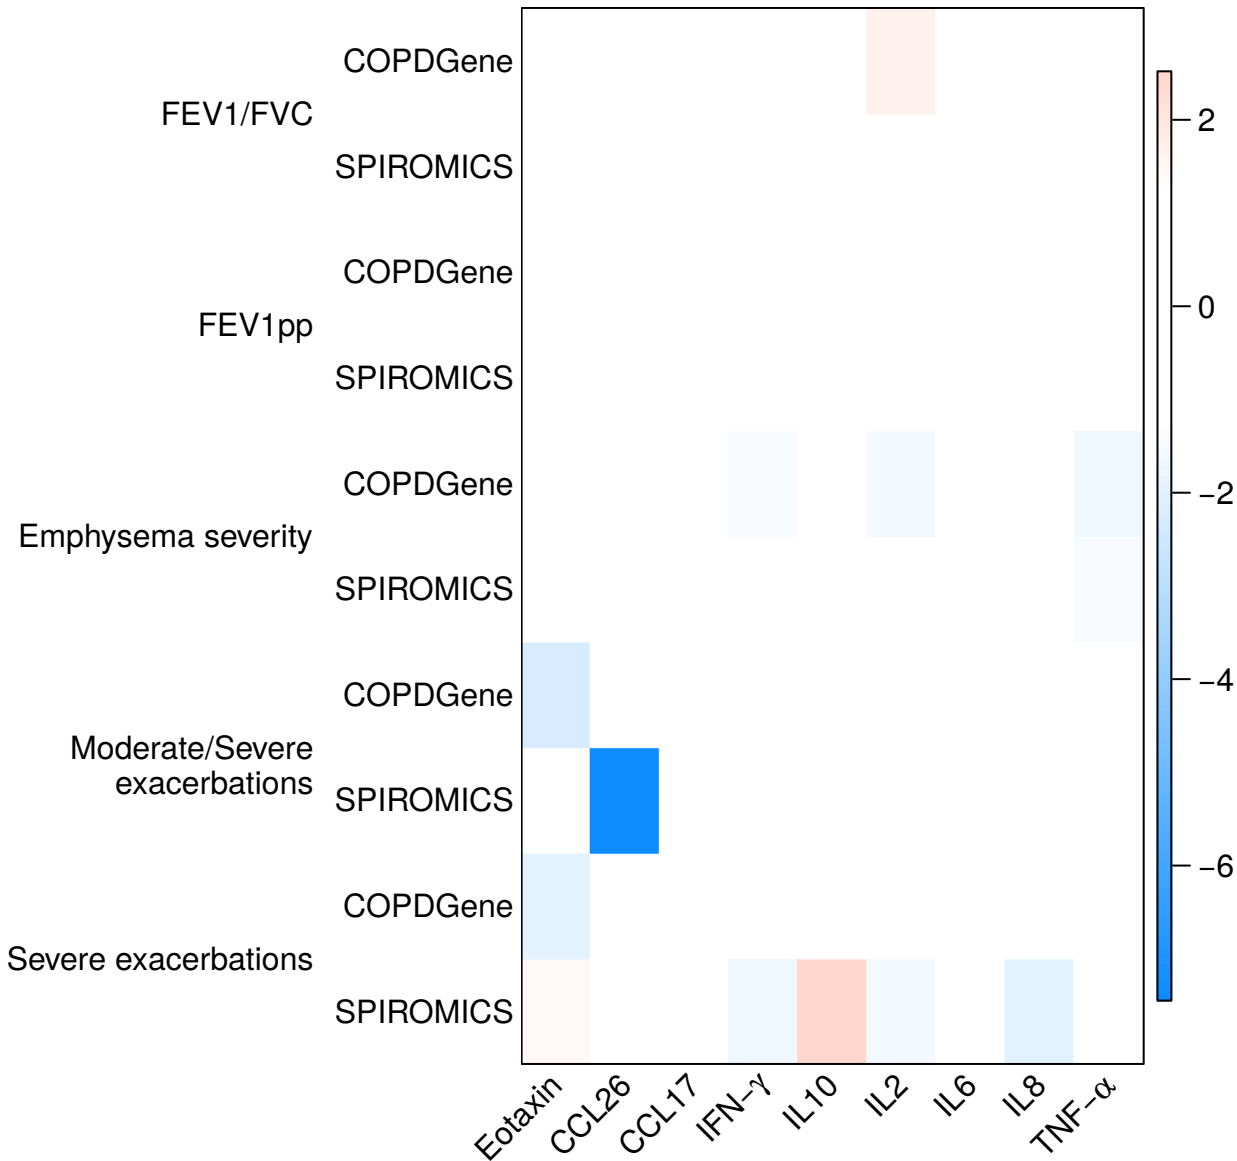

**Cross Sectional Associations in  
COPDGene (N = 157) and SPIROMICS (N = 142)  
Subjects with Bronchitis and no Emphysema**

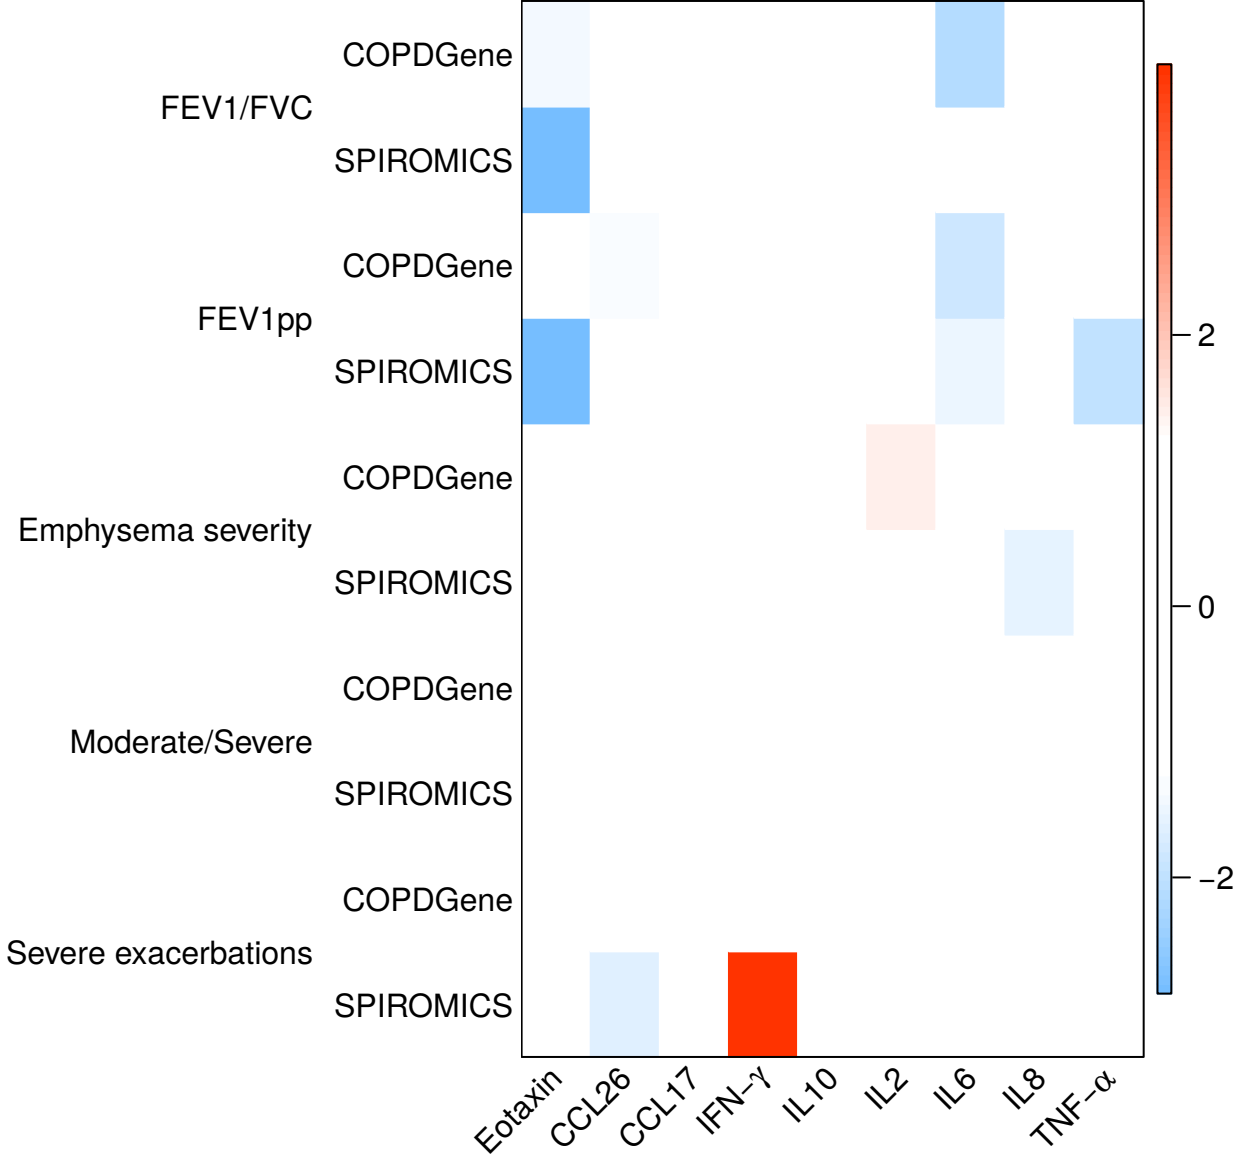

**Cross Sectional Associations in  
COPDGene (N = 462) and SPIROMICS (N = 293)  
Subjects with no Bronchitis and with Emphysema**

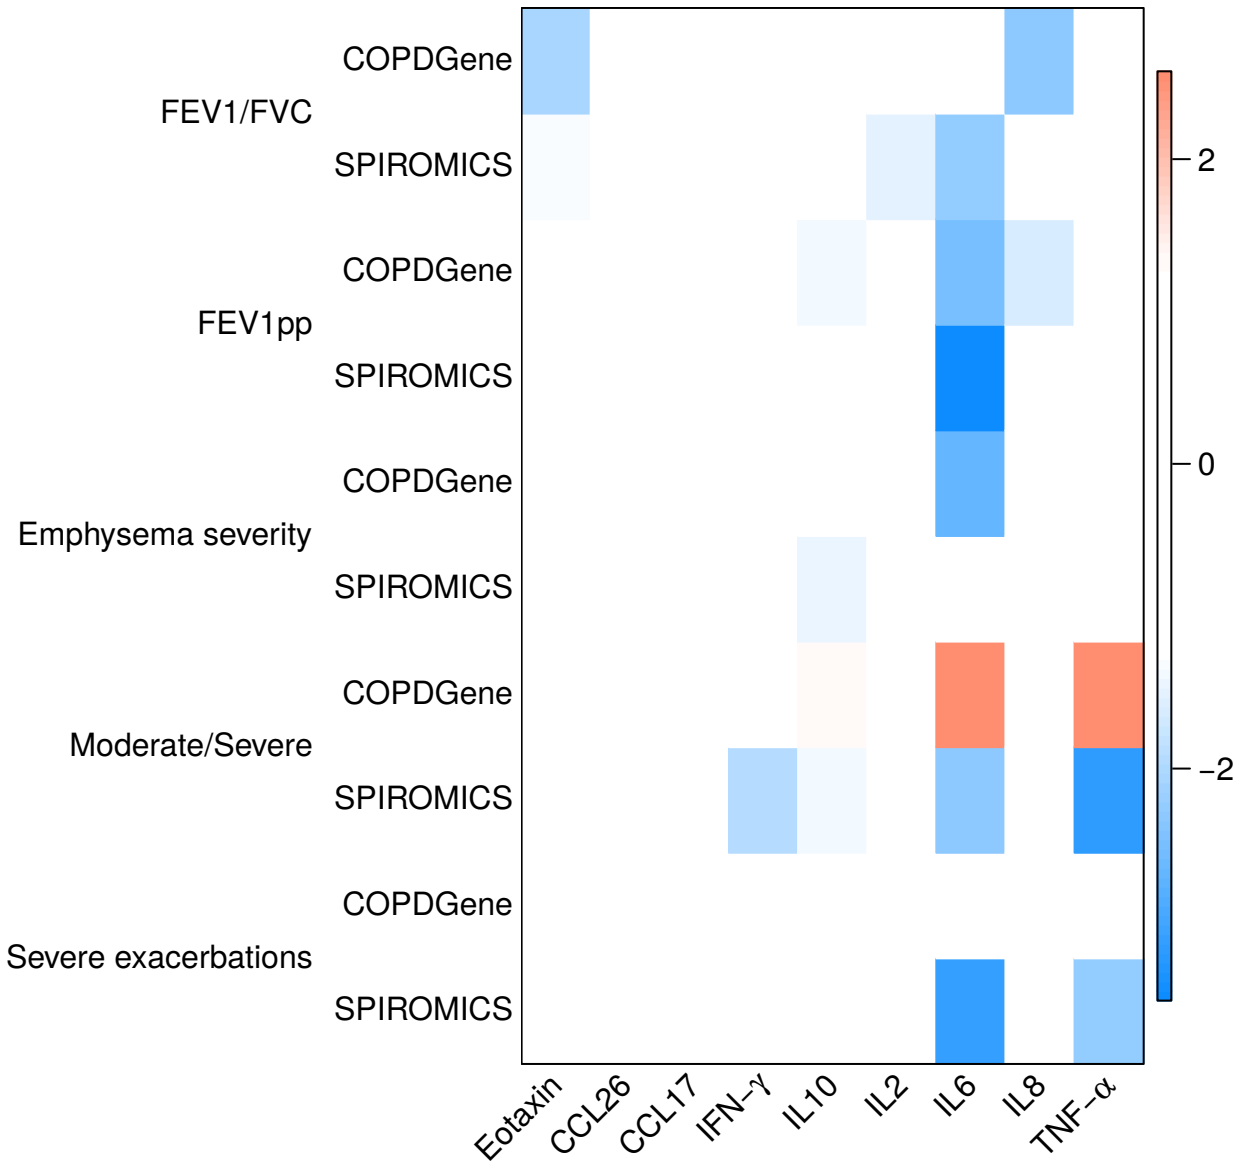

**Cross Sectional Associations in  
COPDGene (N = 1137) and SPIROMICS (N = 556)  
Subjects with no Bronchitis and no Emphysema**

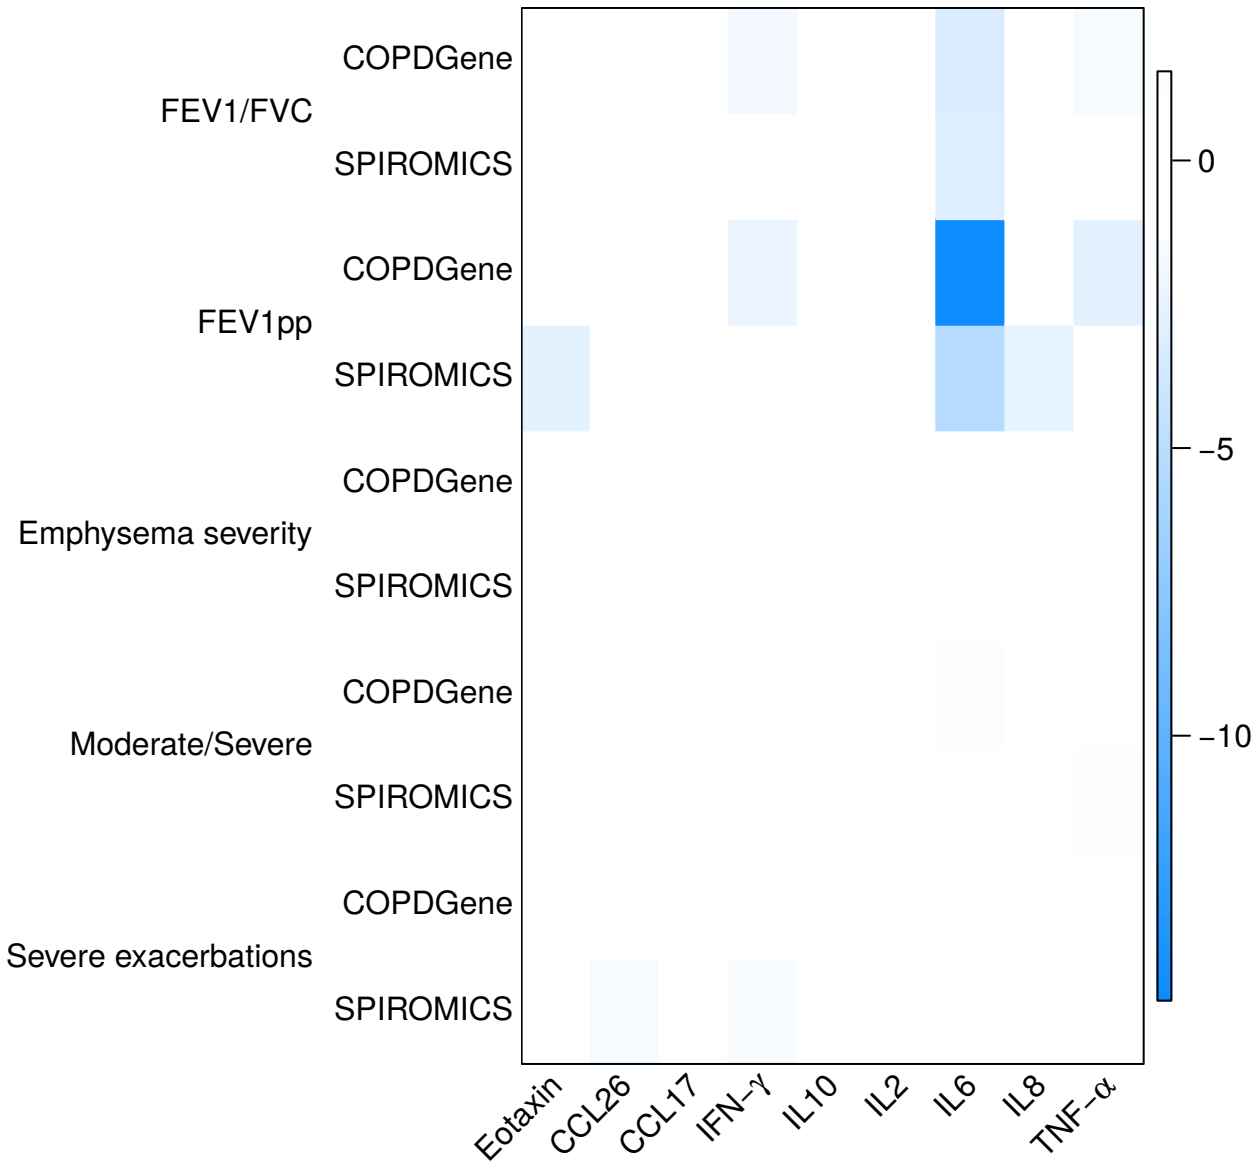

**Cross Sectional Associations in  
COPDGene (N = 503) and SPIROMICS (N = 362)  
Subjects with no COPD and with Emphysema**

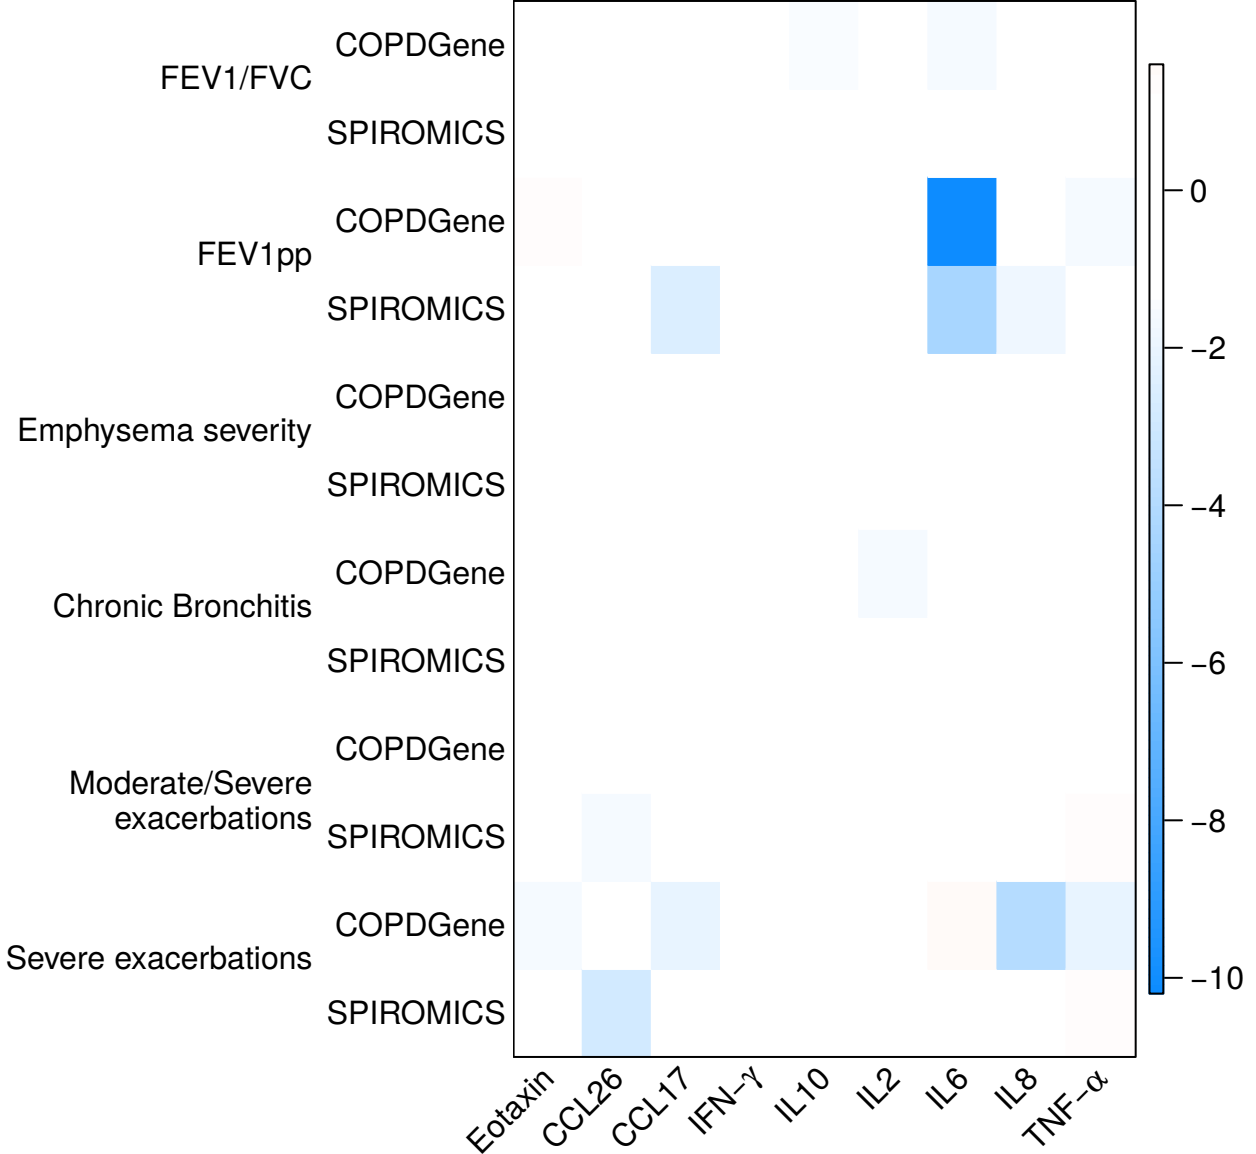

Supplement: MOESM2 [file 15159858]
