# Supplementary material for: The value of blood cytokines and chemokines in assessing COPD
Source: Springer Nature journal article supplement (doi:10.1186/s12931-017-0662-2), 2017-10-24

# Cytokine and Chemokine associations with change in FEV1 in COPD Gene by phenotype subgroup

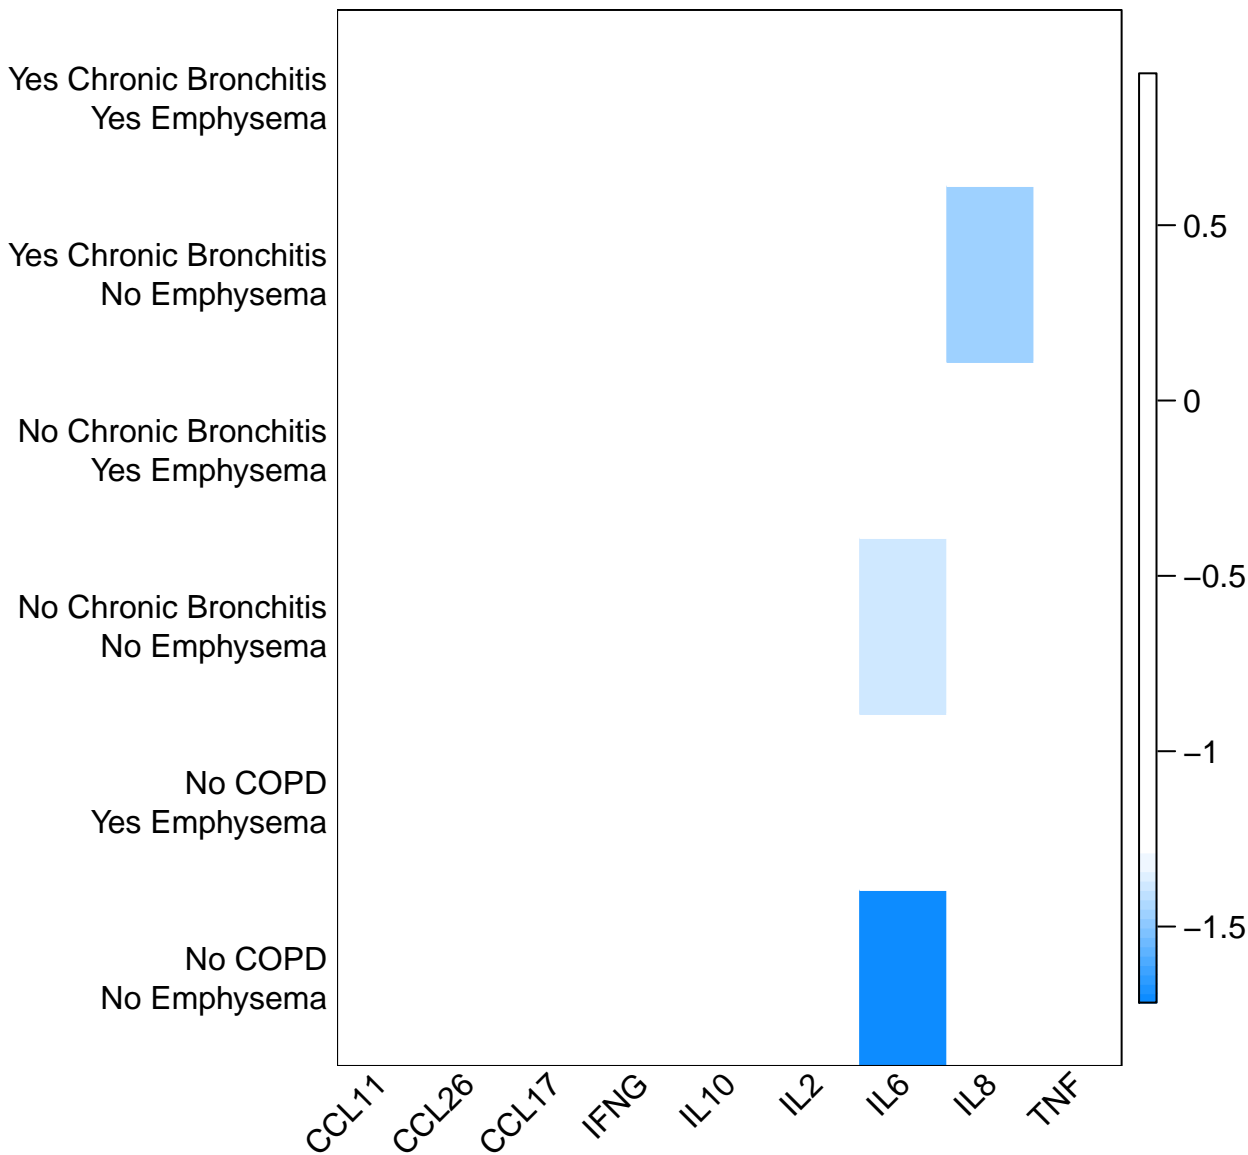

# Cytokine and Chemokine associations with progression of Emphysema in COPD Gene by phenotype subgroup

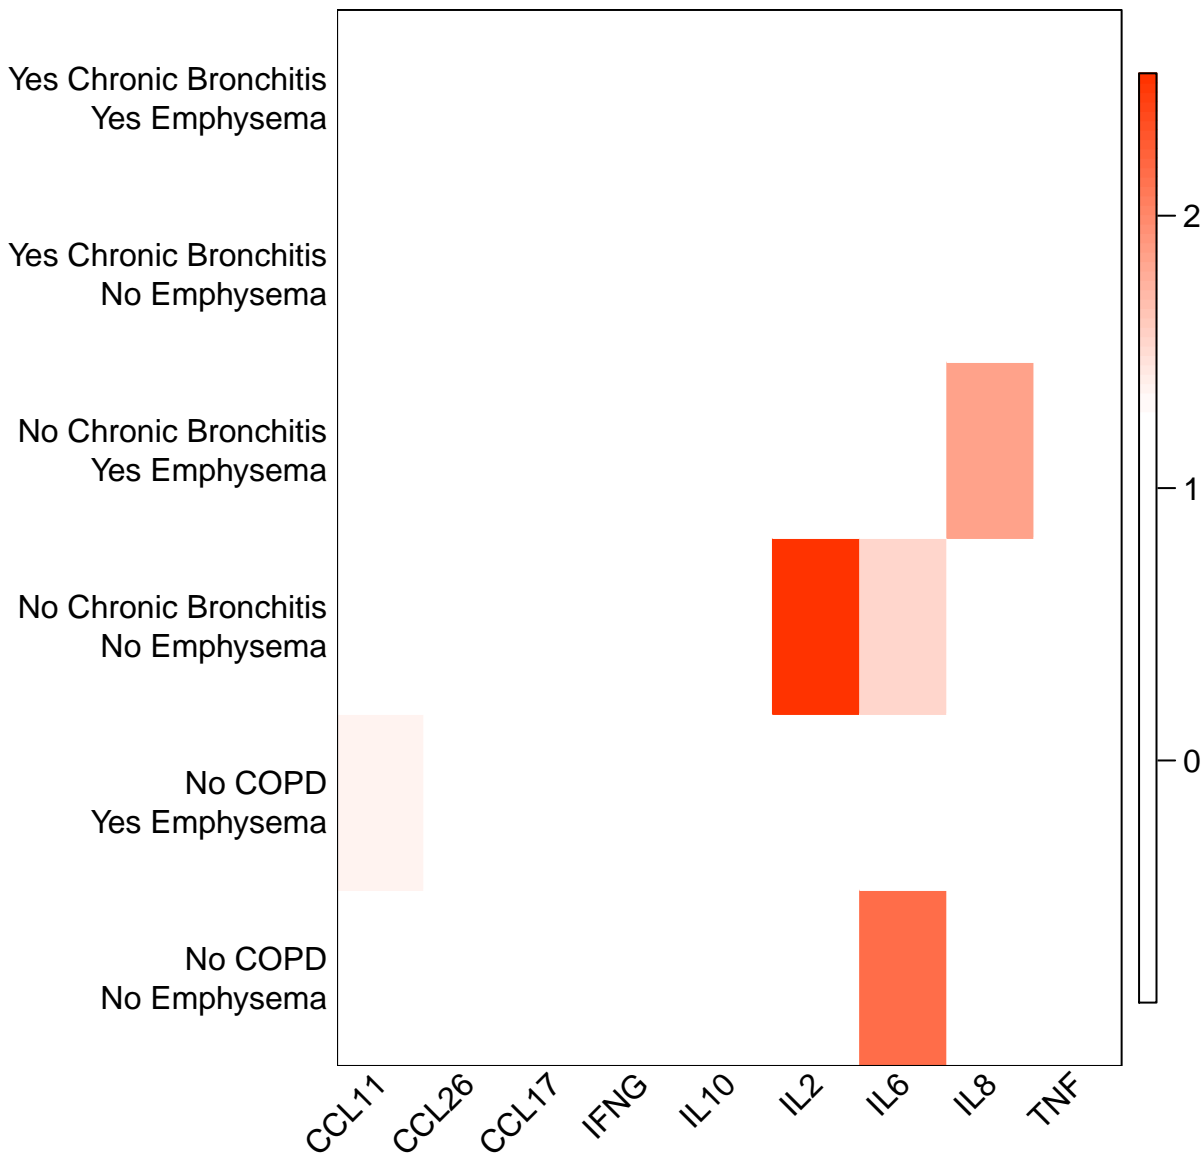

Supplement: MOESM3 [file 15159858]
